# Supplementary material for: Synthesis of glycerol carbonate from glycerol and urea with gold-based catalysts
Source: Royal Society of Chemistry journal article supplement (doi:10.1039/c0dt01389g), 2011-01-01
Supplement: c0dt01389g.pdf [file c0dt01389g.pdf]

## Synthesis of glycerol carbonate from glycerol and urea with gold-based catalysts

### Supplementary Material

*Ceri Hammond,<sup>a</sup> Jose A. Lopez-Sanchez,<sup>a,\*\*</sup> Mohd Hasbi Ab Rahim,<sup>a</sup> Nikolaos Dimitratos,<sup>a</sup> Robert L. Jenkins,<sup>a</sup> Albert F. Carley,<sup>a</sup> Qian He,<sup>b</sup> Christopher J. Kiely,<sup>b</sup> David W. Knight,<sup>a</sup> and Graham J. Hutchings<sup>a\*</sup>*

<sup>a</sup> Cardiff Catalysis Institute, School of Chemistry, Cardiff University, Main Building, Park Place, Cardiff, CF10 3AT, UK

<sup>b</sup> Center for Advanced Materials and Nanotechnology, Lehigh University, 5 East Packer Avenue, Bethlehem, PA 18015-3195, USA

**\*\* Co-corresponding author:**

[sacjal@cardiff.ac.uk](mailto:sacjal@cardiff.ac.uk)

Tel: +44 29 2087 4061

Fax: +44 29 2087 4059

**\*Corresponding author:**

[hutch@cardiff.ac.uk](mailto:hutch@cardiff.ac.uk)

Tel: +44 29 2087 4059

Fax: +44 29 2087 4059

## Contents

Table S1 Reusability data with 2.5 wt% Au/MgO synthesized via an impregnation method<sup>a</sup>

Fig. S1 XRD diffractogram of 2.5 wt% Au supported on MgO, TiO<sub>2</sub>, carbon and ZnO.

Fig. S2 X-ray diffraction patterns for (a) MgO, calcined at 400 °C for 3 h in static air; (b) 2.5 wt. % Au/MgO prepared by impregnation and calcined at 400 °C for 3 h in static air and (c) 2.5 wt. % Au/MgO prepared by impregnation and calcined at 400 °C for 3 h in static air after 9 catalytic cycles.

Fig. S3 TOL data in molar composition obtained with 2.5 wt% Au/MgO (Mol vs Time).

Fig. S4 Plot of glycerol carbonate converted from reaction of glycerol carbonate with urea at 150°C under flow of nitrogen.

Fig. S5 TOL blank glycerol carbonate synthesis reaction performed with a ratio of 2:1 glycerol to urea.

Fig. S6 TOL of 2:1 glycerol to urea ratio with presence of 2.5 wt% Au/MgO impregnation catalyst

**Table S1** Reusability data with 2.5 wt% Au/MgO synthesized via an impregnation method<sup>a</sup>

| Entry | Catalyst                                     | Conv.<br>(%) | Selectivity (%)       |    |    |    | Glycerol<br>Carbonate<br>Yield (%) |
|-------|----------------------------------------------|--------------|-----------------------|----|----|----|------------------------------------|
|       |                                              |              | Glycerol<br>carbonate | 5  | 7  | 9  |                                    |
| 1     | Blank                                        | 59           | 36                    | 44 | 7  | 13 | 21                                 |
| 2     | MgO                                          | 67           | 37                    | 37 | 10 | 16 | 27                                 |
|       | 2.5wt% Au/MgO                                | 81           | 68                    | 16 | 4  | 12 | 56                                 |
| 3     | Fresh                                        |              |                       |    |    |    |                                    |
| 4     | 2.5wt% Au/MgO<br>After 1 <sup>st</sup> used  | 79           | 71                    | 16 | 3  | 10 | 56                                 |
| 5     | 2.5wt% Au/MgO<br>After 2 <sup>nd</sup> used  | 78           | 65                    | 19 | 5  | 11 | 51                                 |
| 6     | 2.5wt% Au/MgO<br>After 4 <sup>th</sup> used  | 80           | 63                    | 20 | 5  | 11 | 51                                 |
| 7     | 2.5wt% Au/MgO<br>After 6 <sup>th</sup> used  | 90           | 63                    | 12 | 6  | 19 | 57                                 |
| 8     | 2.5wt% Au/MgO<br>After 8 <sup>th</sup> used  | 87           | 81                    | 8  | 2  | 9  | 70                                 |
| 9     | 2.5wt% Au/MgO<br>After 10 <sup>th</sup> used | 80           | 69                    | 17 | 4  | 10 | 55                                 |

<sup>a</sup>Reaction conditions: Glycerol to Urea molar ratio: (1:1.5), Temperature: 150 °C, Catalyst: 0.25 g, Reaction time: 4 hrs, N<sub>2</sub> flow. Product (**5**): 2,3-dihydroxypropyl carbamate, Product (**7**): 4-(hydroxymethyl) oxazolidin-2-one, Product (**9**): (2-oxo-1,3-dioxolan-4-yl) methyl carbamate.

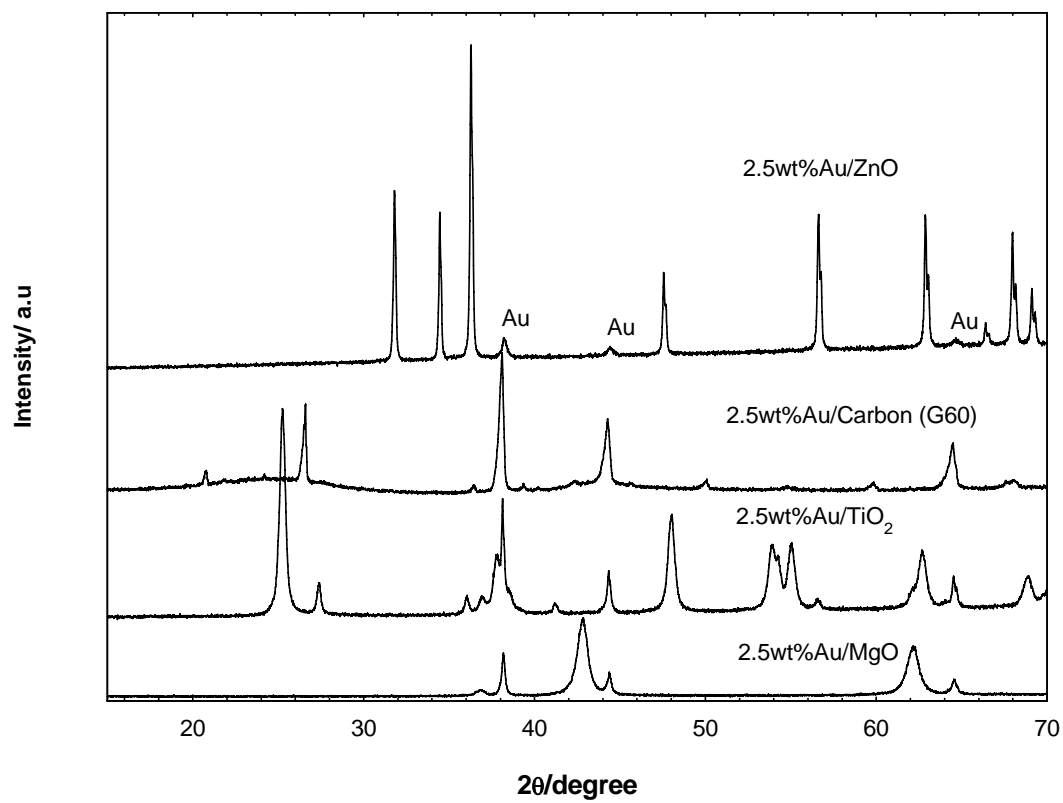

**Fig. S1** XRD diffractogram of 2.5 wt% Au supported on MgO, TiO<sub>2</sub>, carbon and ZnO.

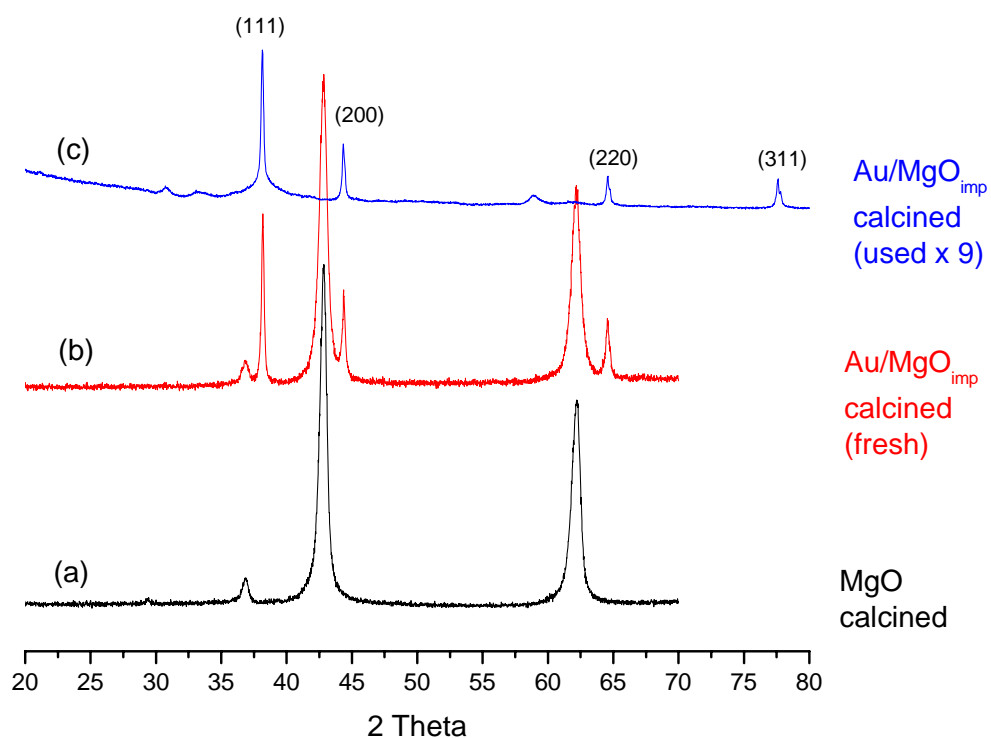

**Fig. S2** X-ray diffraction patterns for (a) MgO, calcined at 400 °C for 3 h in static air; (b) 2.5 wt. % Au/MgO prepared by impregnation and calcined at 400 °C for 3 h in static air and (c) 2.5 wt. % Au/MgO prepared by impregnation and calcined at 400 °C for 3 h in static air after 9 catalytic cycles.

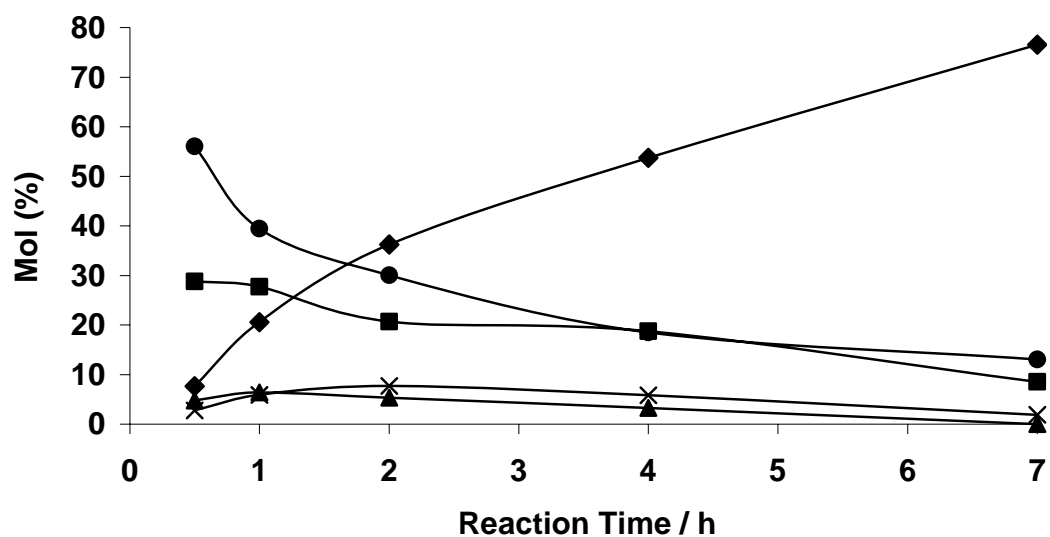

**Fig. S3** TOL data in molar composition obtained with 2.5 wt% Au/MgO (Mol vs Time).  
Key: ◆ 4-(hydroxymethyl)-1,3-dioxolan-2-one, ■ 2,3-dihydroxypropyl carbamate, ▲ 4-(hydroxymethyl) oxazolidin-2-one, × (2-oxo-1,3-dioxolan-4-yl) methyl carbamate, ● glycerol.

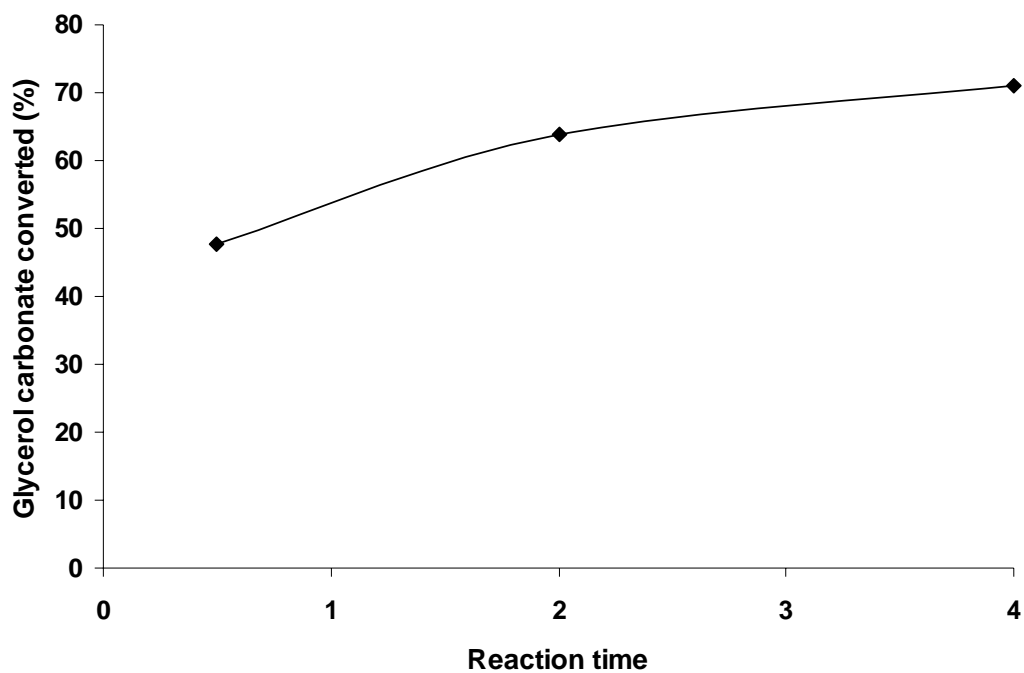

**Fig. S4** Plot of glycerol carbonate converted from reaction of glycerol carbonate with urea at 150°C under flow of nitrogen.

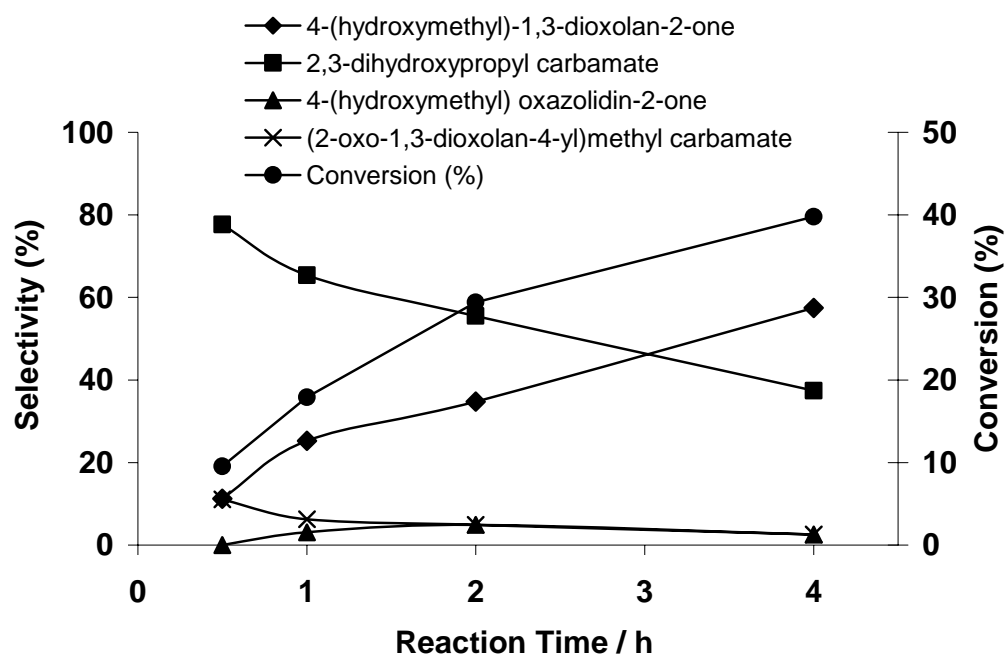

**Fig. S5** TOL blank glycerol carbonate synthesis reaction performed with a 2:1 glycerol: urea. Key: ◆ selectivity to 4-(hydroxymethyl)-1,3-dioxolan-2-one, ■ selectivity to 2,3-dihydroxypropyl carbamate, ▲ selectivity to 4-(hydroxymethyl) oxazolidin-2-one, × selectivity to (2-oxo-1,3-dioxolan-4-yl) methyl carbamate and, ● glycerol conversion.

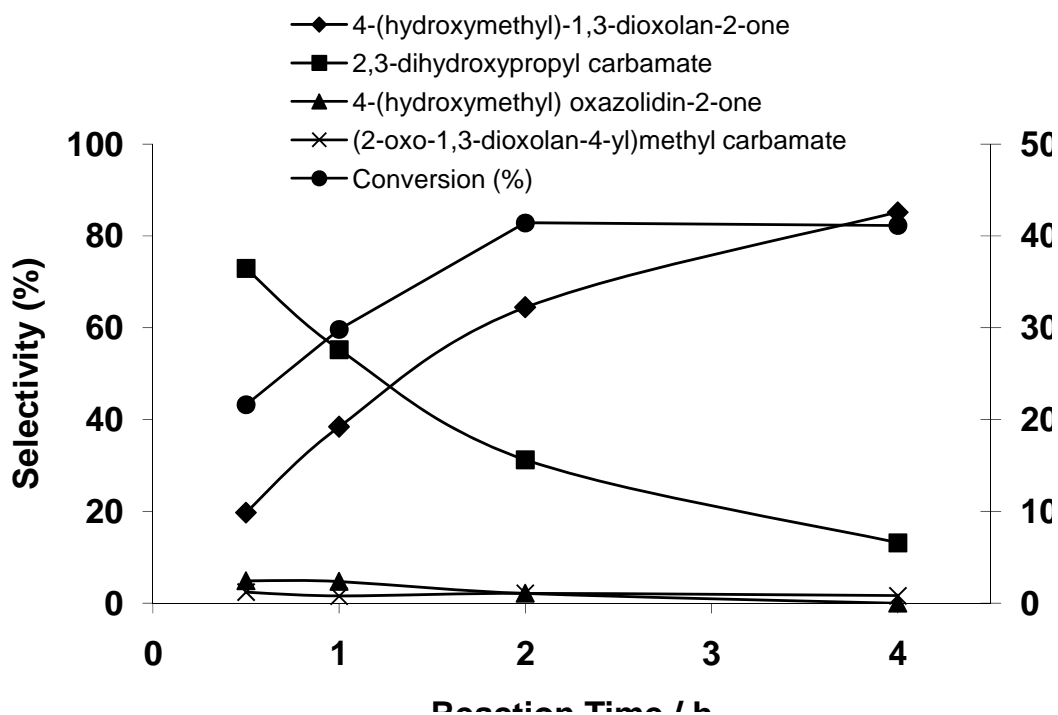

**Fig. S6** TOL of 2:1 glycerol to urea ratio with presence of 2.5 wt% Au/MgO impregnation catalyst. Key: ◆ selectivity to 4-(hydroxymethyl)-1,3-dioxolan-2-one, ■ selectivity to 2,3-dihydroxypropyl carbamate, ▲ selectivity to 4-(hydroxymethyl) oxazolidin-2-one, × selectivity to (2-oxo-1,3-dioxolan-4-yl) methyl carbamate and, ● glycerol conversion.
